# Supplementary material for: Prediction of potential hard sodium carbaboride compounds assuming sp3-bonded covalent clathrates
Source: Royal Society of Chemistry journal article supplement (doi:10.1039/d3cp02236f), 2023-01-01
Supplement: d3cp02236f1.pdf [file d3cp02236f1.pdf]

Supplemental material for “prediction of  
potential hard sodium carbaboride compounds  
assuming  $sp^3$ -bonded covalent clathrates”

Ailing Liu<sup>a</sup>, Xiaoran Cheng<sup>a</sup>, Xingyu Wang<sup>a</sup>, Yutong Zou<sup>a</sup>, and Miao Zhang<sup>a\*</sup>

*Department of Physics, School of Sciences, Beihua University, Jilin 132013, China*

E-mail: zhangmiaolmc@126.com

Table S1 Structural information of the predicted NaBC<sub>11</sub>, Na<sub>2</sub>B<sub>2</sub>C<sub>10</sub>, NaB<sub>2</sub>C<sub>10</sub>, Na<sub>2</sub>B<sub>4</sub>C<sub>8</sub>, NaB<sub>4</sub>C<sub>8</sub>, and Na<sub>2</sub>B<sub>6</sub>C<sub>6</sub> at 0 GPa.

|                                                | Space group               | Lattice parameters(Å)                                                                | Atomic positions                                                                                                                                                                                                                                                             |
|------------------------------------------------|---------------------------|--------------------------------------------------------------------------------------|------------------------------------------------------------------------------------------------------------------------------------------------------------------------------------------------------------------------------------------------------------------------------|
| NaBC <sub>11</sub>                             | <i>Pmm2</i>               | $a = 4.4930$<br>$b = 4.4984$<br>$c = 4.4736$<br>$\alpha = \beta = \gamma = 90^\circ$ | Na 1c (0.5, 0.0, 0.00878)<br>B 1d (0.5, 0.5, 0.25111)<br>C 1d (0.5, 0.5, 0.74653)<br>C 1a (0.0, 0.0, 0.25037)<br>C 1a (0.0, -0.0, 0.74863)<br>C 2f (0.24283, 0.5, 0.99141)<br>C 2h (0.5, 0.24322, 0.50709)<br>C 2e (0.75143, -0.0, 0.50595)<br>C 2g (-0.0, 0.74949, 0.99284) |
| Na <sub>2</sub> B <sub>2</sub> C <sub>10</sub> | <i>P4<sub>2</sub>/mmc</i> | $a = b = 4.6107$<br>$c = 4.5306$<br>$\alpha = \beta = \gamma = 90^\circ$             | Na 2d (0.0, 0.5, 0.5)<br>B 2f (0.5, 0.5, 0.25)<br>C 2e (0.0, 0.0, 0.25)<br>C 4m (0.23486, 0.5, 0.0)<br>C 4l (0.75060, 0.0, 0.5)                                                                                                                                              |
| NaB <sub>2</sub> C <sub>10</sub>               | <i>Pmmm</i>               | $a = 4.6024$<br>$b = 4.6134$<br>$c = 4.3318$<br>$\alpha = \beta = \gamma = 90^\circ$ | Na 1a (0.0, 0.0, 0.0)<br>B 2r (0.0, 0.5, 0.25424)<br>C 2s (0.5, -0.0, 0.25117)<br>C 2k (0.73064, 0.5, -0.0)<br>C 2j (0.24649, -0.0, 0.5)<br>C 2o (0.5, 0.74478, -0.0)<br>C 2n (0.0, 0.23103, 0.5)                                                                            |
| Na <sub>2</sub> B <sub>4</sub> C <sub>8</sub>  | <i>I4/mmm</i>             | $a = b = 4.8159$<br>$c = 4.3080$<br>$\alpha = \beta = \gamma = 90^\circ$             | Na 2a (0.5, 0.5, 0.5)<br>B 4d (0.0, 0.5, 0.25)<br>C 8j (0.72871, 0.5, 0.0)                                                                                                                                                                                                   |
| NaB <sub>4</sub> C <sub>8</sub>                | <i>P4/mmm</i>             | $a = b = 4.8079$<br>$c = 4.1223$<br>$\alpha = \beta = \gamma = 90^\circ$             | Na 1a (0.0, 0.0, 0.0)<br>B 4i (0.0, 0.5, 0.25249)<br>C 4n (0.72316, 0.5, 0.0)<br>C 4m (0.22659, 0.0, 0.5)                                                                                                                                                                    |
| Na <sub>2</sub> B <sub>6</sub> C <sub>6</sub>  | <i>Pm - 3n</i>            | $a = b = c = 4.7326$<br>$\alpha = \beta = \gamma = 90^\circ$                         | Na 2a (1.0, 0.0, 1.0)<br>B 6c (0.25, 1.0, 0.5)<br>C 6d (0.25, 0.5, 1.0)                                                                                                                                                                                                      |

Table S2 Calculated elastic constants  $C_{ij}$  (in GPa), bulk modulus  $B$  (GPa), shear modulus  $G$  (GPa), ratio of  $G/B$ , and Vickers hardness  $H_v$  (GPa) of  $\text{NaBC}_{11}$ ,  $\text{Na}_2\text{B}_2\text{C}_{10}$ ,  $\text{NaB}_2\text{C}_{10}$ ,  $\text{Na}_2\text{B}_4\text{C}_8$ , and  $\text{NaB}_4\text{C}_8$  at 0 GPa.

|                                      | $C_{11}$ | $C_{22}$ | $C_{33}$ | $C_{44}$ | $C_{55}$ | $C_{66}$ | $C_{12}$ | $C_{13}$ | $C_{23}$ | $B$ | $G$ | $G/B$ | $H_v^{\text{Chen}}$ |
|--------------------------------------|----------|----------|----------|----------|----------|----------|----------|----------|----------|-----|-----|-------|---------------------|
| $\text{NaBC}_{11}$                   | 775      | 774      | 704      | 297      | 291      | 315      | 74       | 73       | 78       | 300 | 315 | 1.05  | 58.28               |
| $\text{Na}_2\text{B}_2\text{C}_{10}$ | 718      | 718      | 619      | 252      | 252      | 282      | 67       | 75       | 75       | 276 | 278 | 1.01  | 51.43               |
| $\text{NaB}_2\text{C}_{10}$          | 789      | 795      | 574      | 277      | 263      | 303      | 60       | 77       | 78       | 285 | 296 | 1.04  | 55.43               |
| $\text{Na}_2\text{B}_4\text{C}_8$    | 730      | 730      | 456      | 229      | 229      | 255      | 36       | 78       | 78       | 251 | 253 | 1.01  | 48.51               |
| $\text{NaB}_4\text{C}_8$             | 801      | 801      | 424      | 220      | 220      | 288      | 37       | 73       | 73       | 256 | 261 | 1.02  | 50.07               |

For the Tetragonal crystals, the mechanical stability requires that the elastic constants satisfy the following mechanical criteria:  $C_{11} > 0$ ,  $C_{33} > 0$ ,  $C_{44} > 0$ ,  $C_{66} > 0$ ,  $(C_{11} - C_{12}) > 0$ ,  $(C_{11} + C_{33} - 2C_{13}) > 0$ ,  $[2(C_{11} + C_{12}) + C_{33} + 4C_{13}] > 0$ . For the Orthorhombic crystals, the mechanical stability requires that the elastic constants satisfy the following mechanical criteria:  $C_{11} > 0$ ,  $C_{22} > 0$ ,  $C_{33} > 0$ ,  $C_{44} > 0$ ,  $C_{55} > 0$ ,  $C_{66} > 0$ ,  $[C_{11} + C_{22} + C_{33} + 2(C_{12} + C_{13} + C_{23})] > 0$ ,  $(C_{11} + C_{22} - 2C_{12}) > 0$ ,  $(C_{11} + C_{33} - 2C_{13}) > 0$ ,  $(C_{22} + C_{33} - 2C_{23}) > 0$

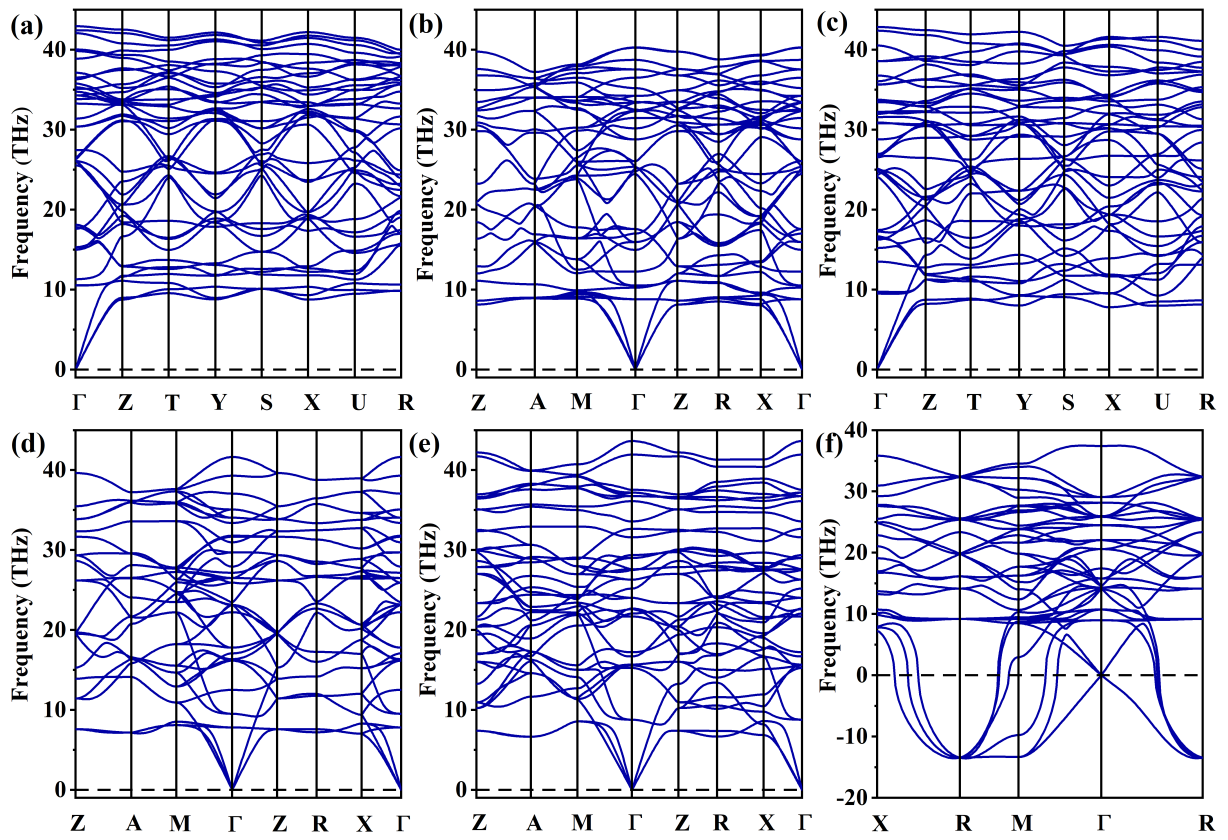

Fig. S1 Calculated phonon dispersion curves for (a)  $\text{NaBC}_{11}$  (b)  $\text{Na}_2\text{B}_2\text{C}_{10}$  (c)  $\text{NaB}_2\text{C}_{10}$  (d)  $\text{Na}_2\text{B}_4\text{C}_8$  (e)  $\text{NaB}_4\text{C}_8$  (f)  $\text{Na}_2\text{B}_6\text{C}_6$  at 50 GPa.

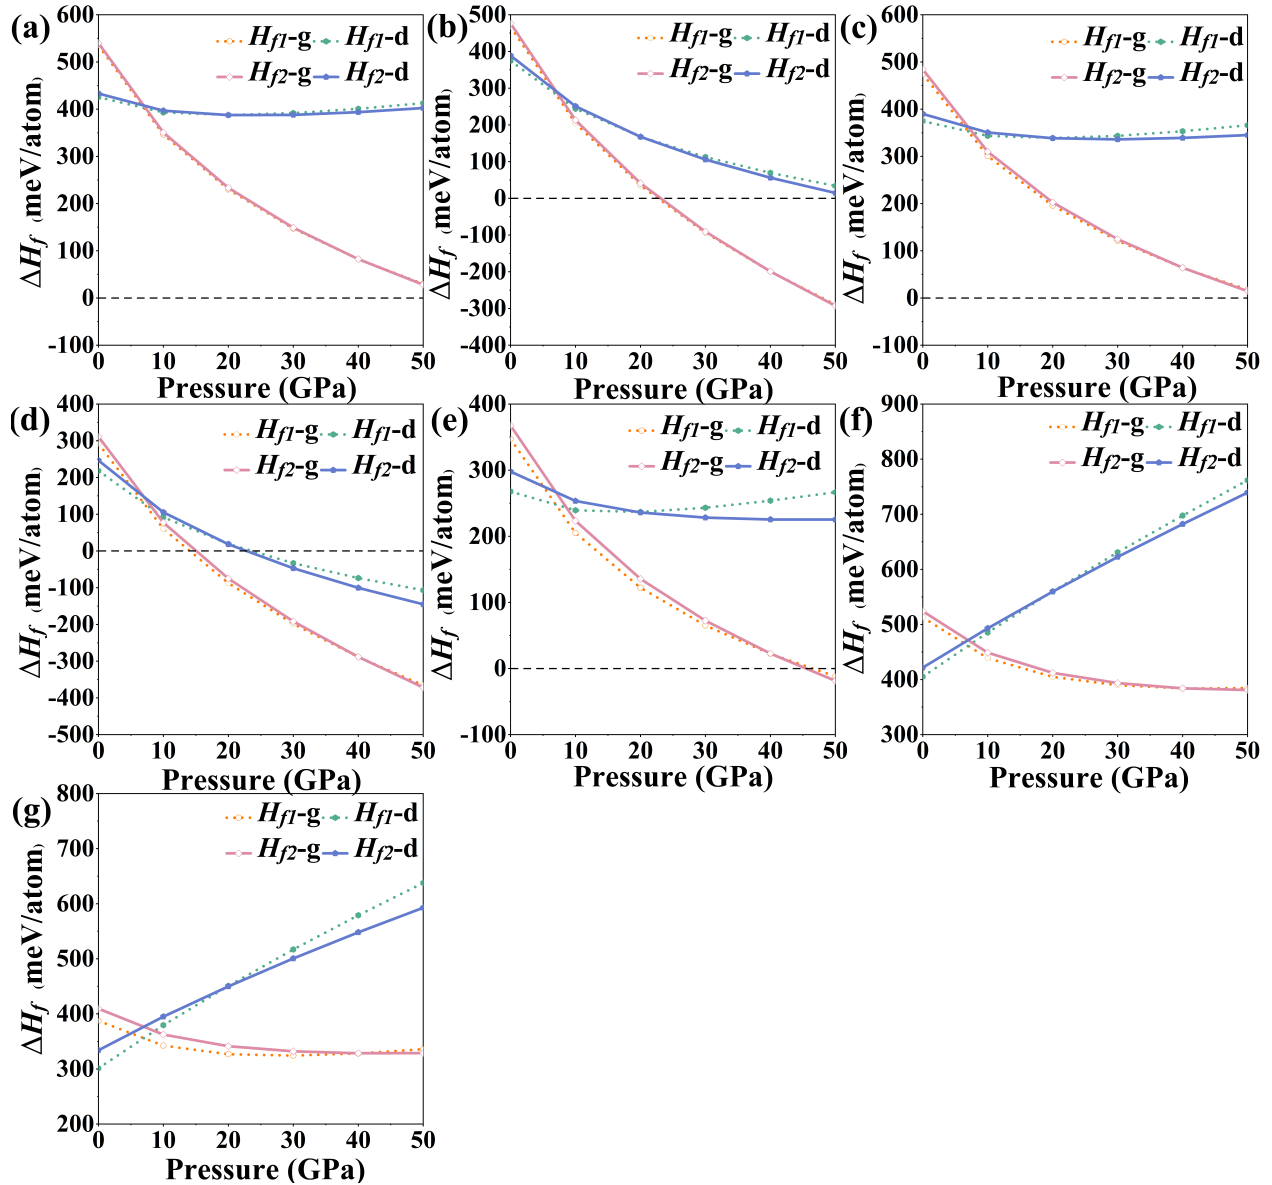

Fig. S2 Calculated formation enthalpies for  $\Delta H_f$  as a function of pressure. (a)  $\text{NaBC}_{11}$ . (b)  $\text{Na}_2\text{B}_2\text{C}_{10}$ . (c)  $\text{NaB}_2\text{C}_{10}$ . (d)  $\text{Na}_2\text{B}_4\text{C}_8$ . (e)  $\text{NaB}_4\text{C}_8$ . (f)  $\text{B}_2\text{C}_{10}$ . (g)  $\text{B}_4\text{C}_8$ . Here, “g” and “d” represent the carbon using graphite and diamond in two possible synthesis paths, respectively.

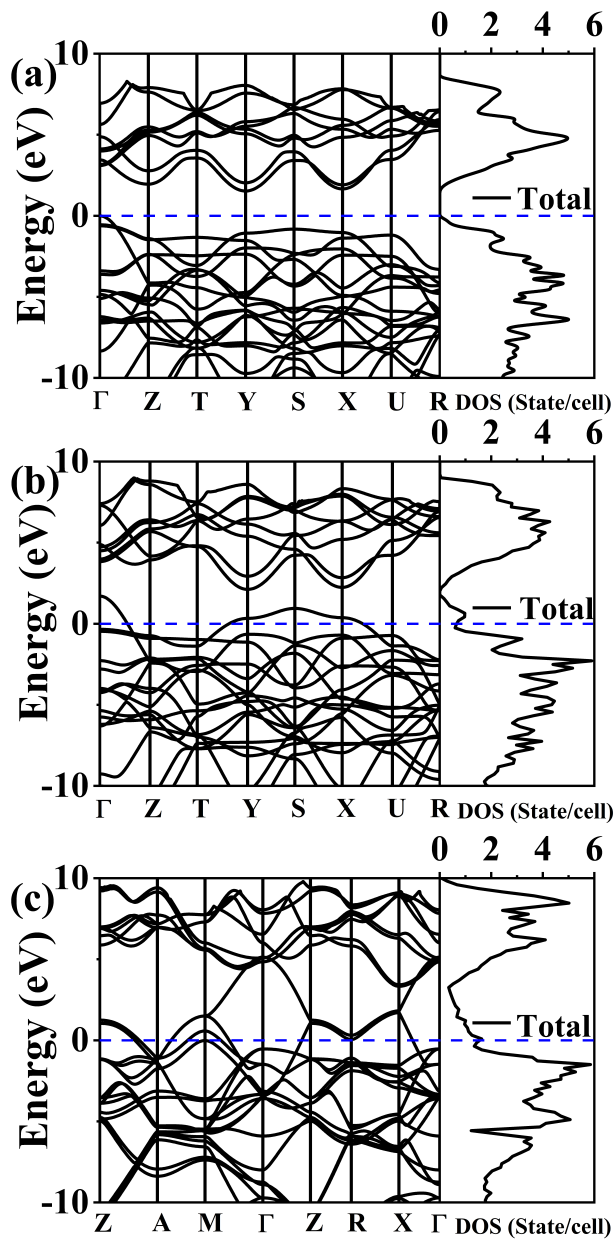

Fig. S3 Electronic band structures and density of states of (a) NaBC<sub>11</sub>. (b) NaB<sub>2</sub>C<sub>10</sub>. (c) NaB<sub>4</sub>C<sub>8</sub>, at 0 GPa.

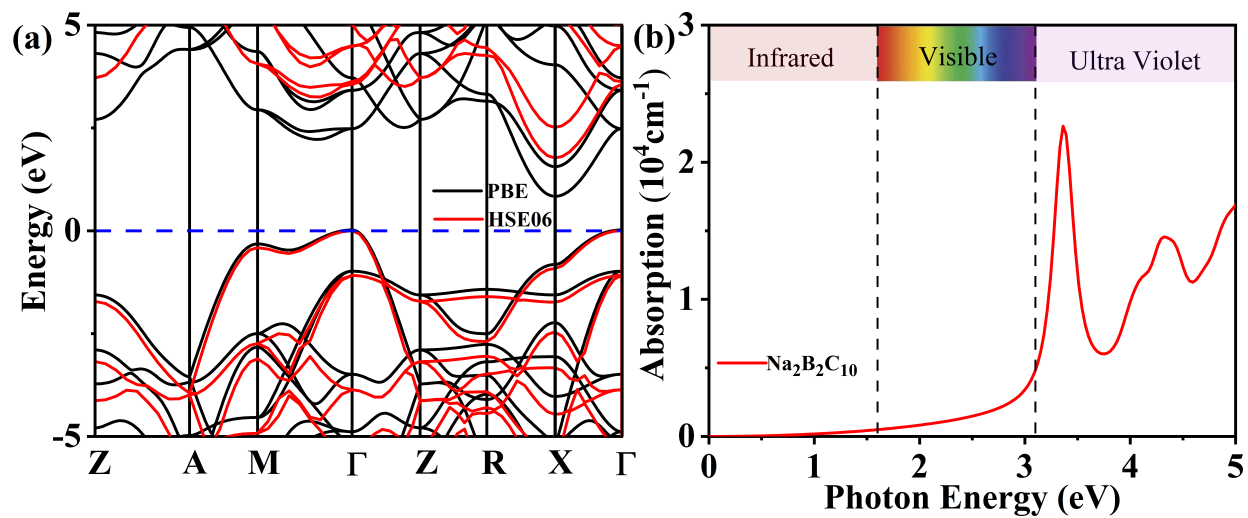

Fig. S4 Calculated (a) band structure of  $\text{Na}_2\text{B}_2\text{C}_{10}$  using the PBE (black lines) and HSE06 (red lines) functionals, and (b) optical absorption spectra of  $\text{Na}_2\text{B}_2\text{C}_{10}$  were simulated by HSE06 function under ambient pressure.

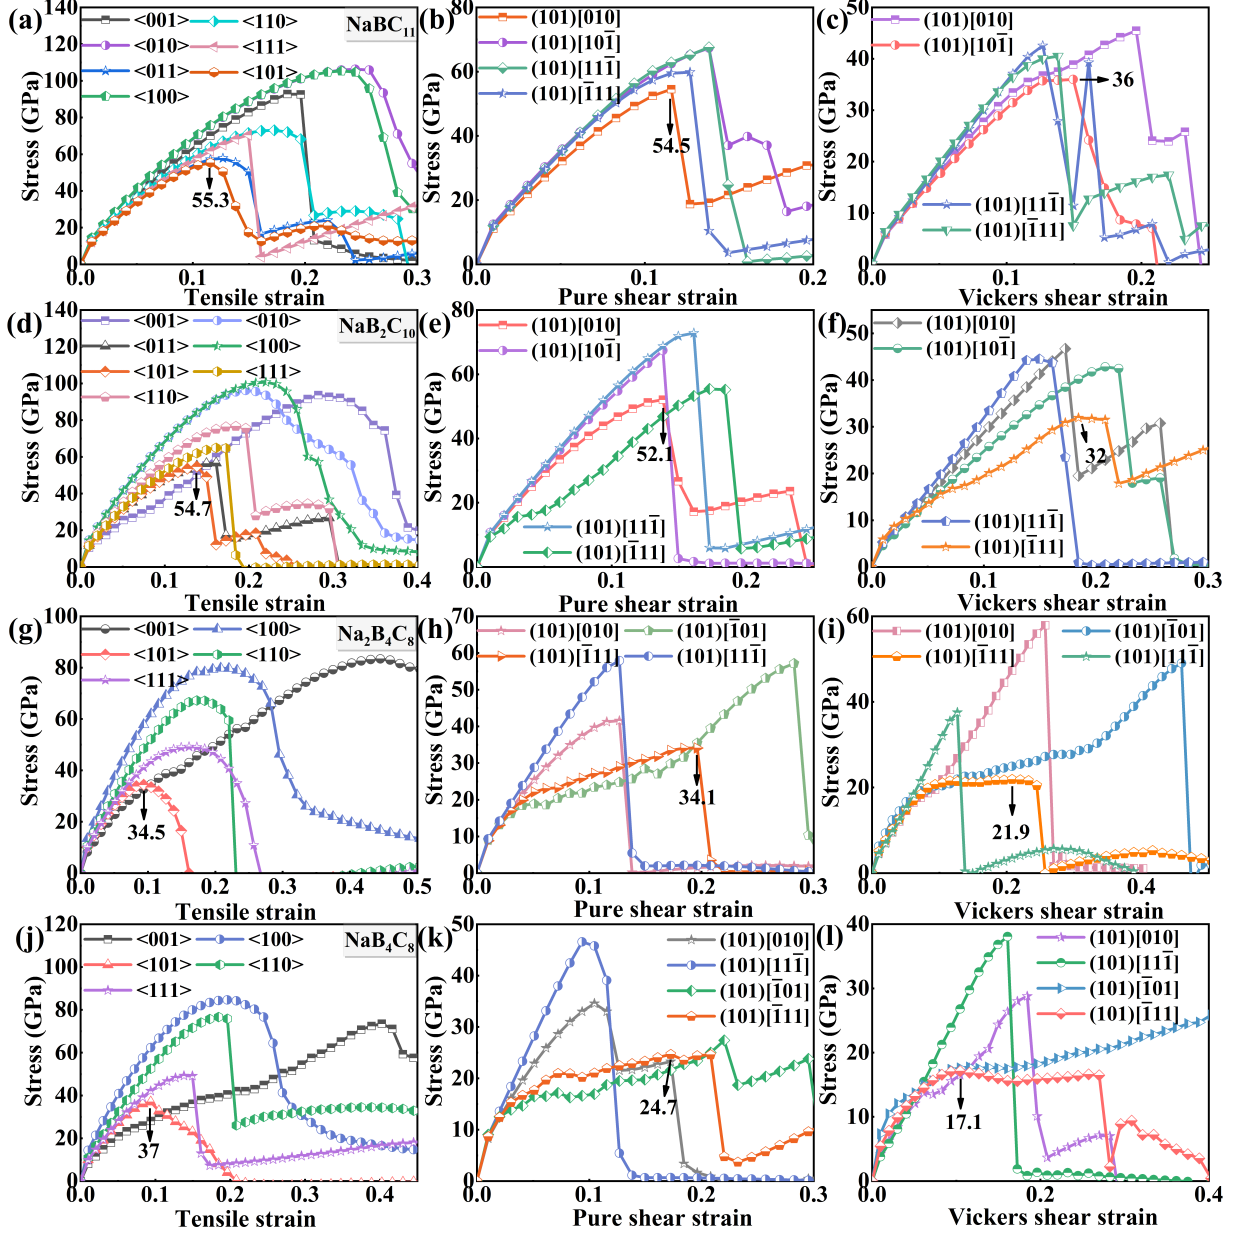

Fig. S5 Calculated tensile, pure shear and Vickers indentation shear deformation stress - strain curves of (a-c) NaBC<sub>11</sub>, (d-f) NaB<sub>2</sub>C<sub>10</sub>, (g-i) Na<sub>2</sub>B<sub>4</sub>C<sub>8</sub>, and (j-l) NaB<sub>4</sub>C<sub>8</sub>.
